# Supplementary material for: Accurate description of hybridized local and charge-transfer excited-state in donor–acceptor molecules using density functional theory
Source: Royal Society of Chemistry journal article supplement (doi:10.1039/c6ra22267f), 2016-01-01
Supplement: c6ra22267f1.pdf [file c6ra22267f1.pdf]

Supporting Information

*RSC Advances*

## Supporting Information

### **Accurate Description of Hybridized Local and Charge-transfer Excited-state in Donor-Acceptor Molecules Using Density Functional Theory**

*Y. Y. Pan, \*<sup>ab</sup> J. Huang,<sup>a</sup> Z. M. Wang,<sup>a</sup> S. T. Zhang,<sup>b</sup> D. W. Yu,<sup>a</sup> B. Yang \*<sup>b</sup> and Y. G. Ma<sup>c</sup>*

<sup>[a]</sup>School of Petrochemical Engineering, Shenyang University of Technology, 30 Guanghua Street, Liaoyang, 111003, P. R. China

<sup>[b]</sup>State Key Laboratory of Supramolecular Structure and Materials, Jilin University, 2699 Qianjin Avenue, Changchun 130012, P.R. China.

<sup>[c]</sup>State Key Laboratory of Luminescent Materials and Devices, Institute of Polymer Optoelectronic Materials and Devices, South China University of Technology, Guangzhou, 510640, P. R. China.

### **Contents**

**Part I . The optimised  $\omega$  of TPA-AC in ground and excited state.**

**Part II . The optimised geometries of ground and excited state employed different functionals.**

**Part III. The excited-state properties of TPA-AC in different solvents employed different functionals.**

Part I : The optimised  $\omega$  of TPA-AC in ground and excited state.

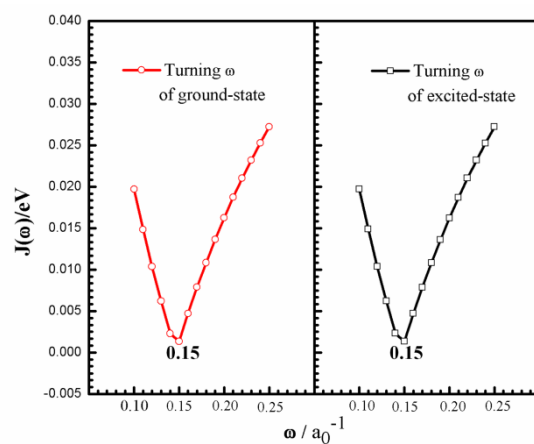

**Figure S1** Tuning  $\omega$  for TPA-AC in vacuum (the optimal  $\omega$  are 0.15 in ground-state and 0.15 in excited-state for which  $J(\omega)$  is at minimum).

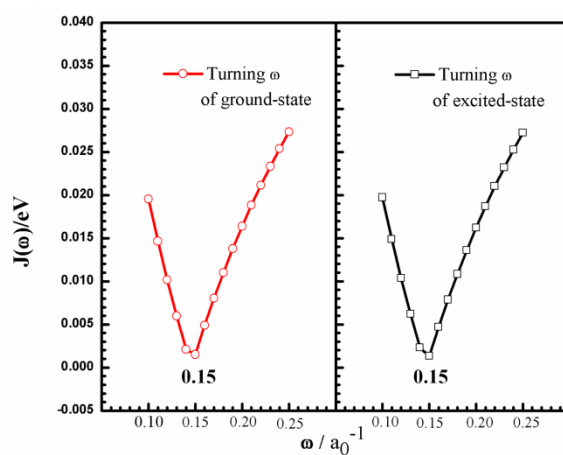

**Figure S2** Tuning  $\omega$  for TPA-AC in hexane (the optimal  $\omega$  are 0.15 in ground-state and 0.15 in excited-state for which  $J(\omega)$  is at minimum).

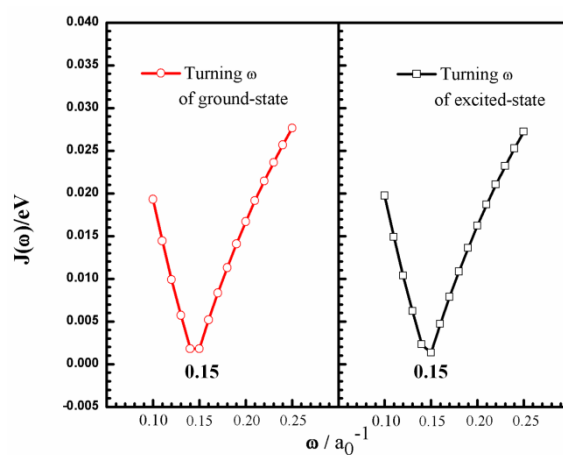

**Figure S3** Tuning  $\omega$  for TPA-AC in tetrahydrofuran (the optimal  $\omega$  are 0.15 in ground-state and 0.15 in excited-state for which  $J(\omega)$  is at minimum).

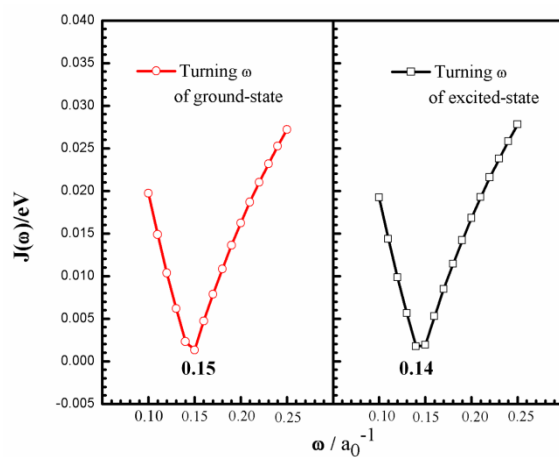

**Figure S4** Tuning  $\omega$  for TPA-AC in acetonitrile (the optimal  $\omega$  are 0.15 in ground-state and 0.14 in excited-state for which  $J(\omega)$  is at minimum).

Part II : The optimised geometries of ground and excited state employed different functionals.

SVWN

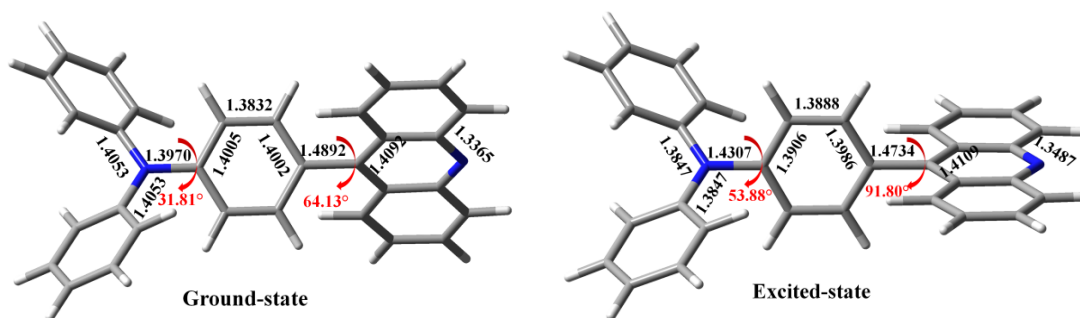

PBE

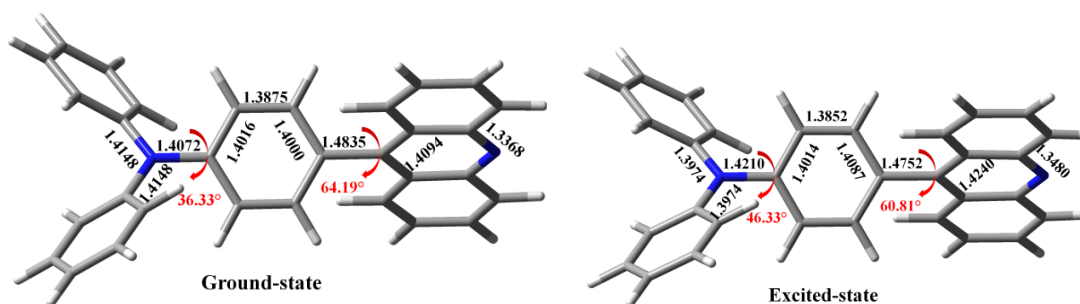

BLYP

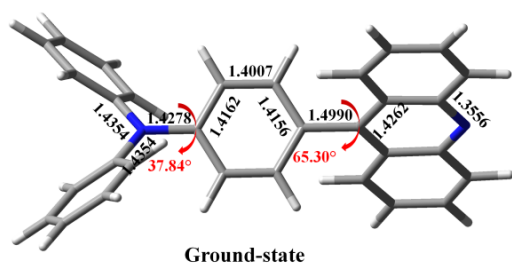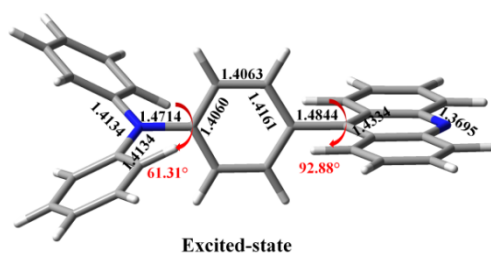

B3LYP

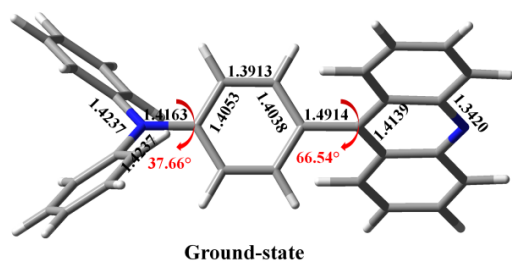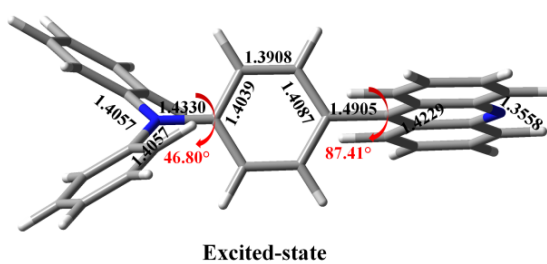

PBE0

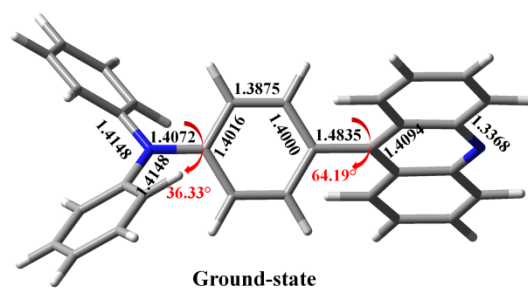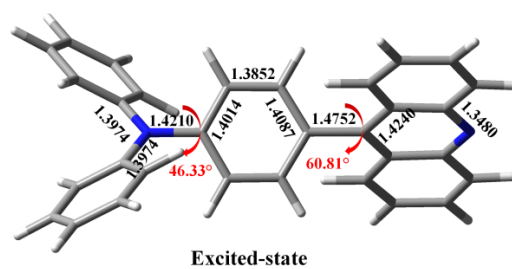

BMK

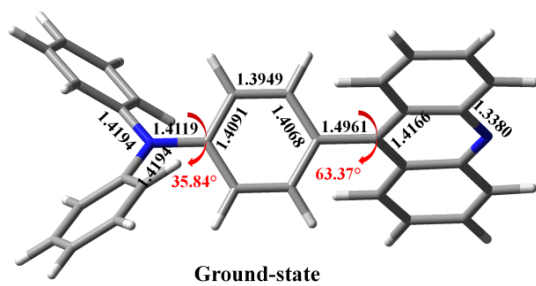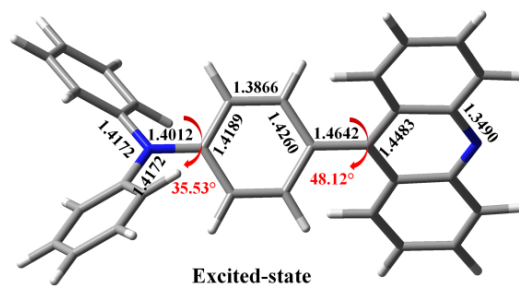

BHHLYP

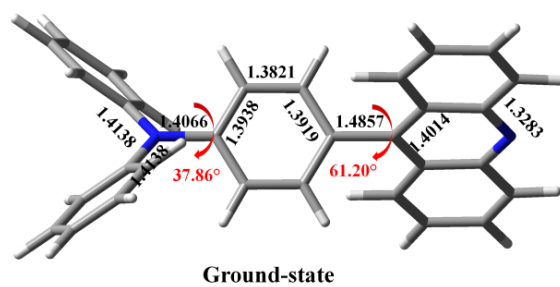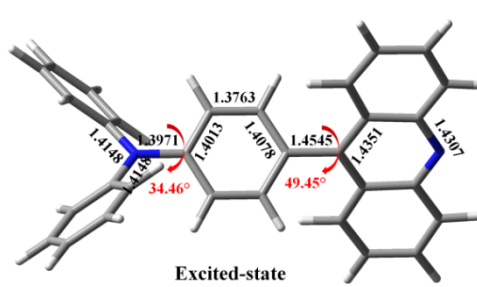

M06-2X

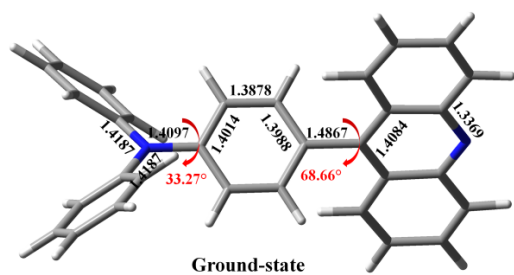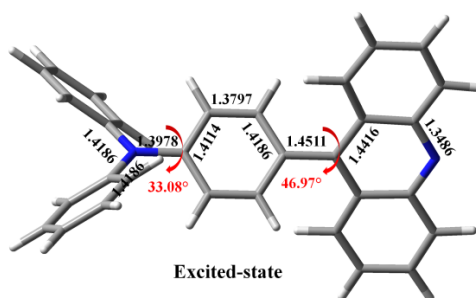

M06HF

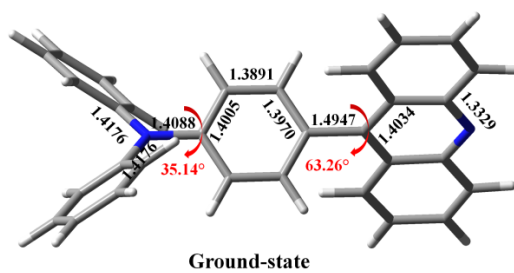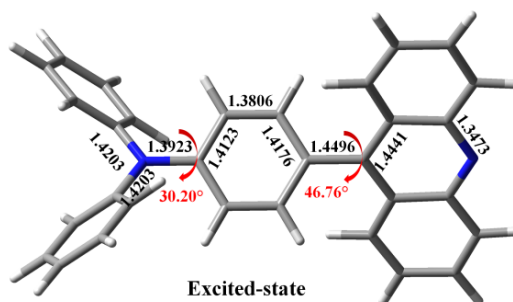

$\omega$ B97X

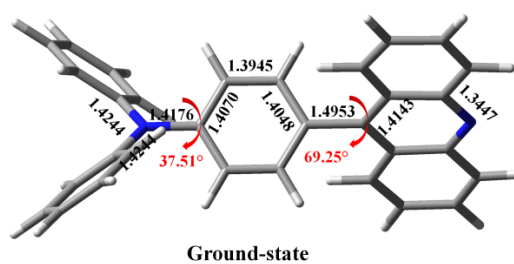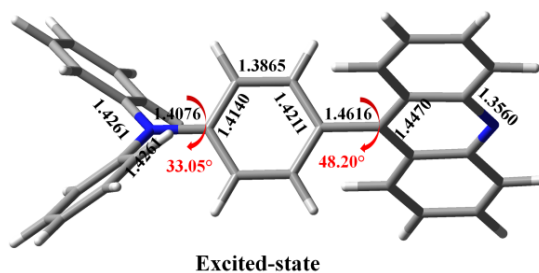

Part III: The excited-state properties of TPA-AC in different solvents employed different functionals.

Table S1. Absorption and emission properties of TPA-AC with an increasing solvent polarities were estimated using different functional with PCM-TD-DFT/ 6-31+G (d, p) solvation model.

|               | vacuum  |         | n-hexane |         | tetrahydrofuran |         | acetonitrile |         |
|---------------|---------|---------|----------|---------|-----------------|---------|--------------|---------|
|               | Abs(nm) | PL (nm) | Abs(nm)  | PL (nm) | Abs(nm)         | PL (nm) | Abs(nm)      | PL (nm) |
| SVWN          | 632.26  | 806.09  | 661.11   | 853.16  | 693.02          | 887.36  | 704.17       | 904.53  |
| PBE           | 430.90  | 482.61  | 443.83   | 615.09  | 458.11          | 778.74  | 463.12       | 804.65  |
| BLYP          | 649.78  | 791.43  | 677.15   | 847.16  | 710.04          | 872.24  | 721.9        | 887.20  |
| B3LYP         | 458.31  | 523.10  | 472.37   | 788.04  | 488.6           | 1293.02 | 494.32       | 1114.43 |
| PBE0          | 430.90  | 481.33  | 443.83   | 615.09  | 458.11          | 778.74  | 463.12       | 804.65  |
| BMK           | 372.60  | 435.92  | 381.67   | 470.81  | 389.35          | 609.41  | 391.99       | 585.76  |
| M062X         | 336.38  | 418.42  | 358.65   | 439.64  | 366.46          | 529.69  | 367.99       | 542.34  |
| BHHLP         | 354.58  | 424.77  | 341.48   | 426.16  | 343.86          | 466.20  | 344.35       | 494.12  |
| M06HF         | 302.70  | 341.60  | 307.20   | 395.92  | 308.83          | 420.36  | 308.99       | 437.02  |
| $\omega$ B97X | 364.06  | 442.20  | 369.75   | 450.91  | 372.49          | 501.42  | 373.13       | 555.06  |
| Experiment    | -       | -       | 384      | 440     | 386             | 518     | 384          | 564     |
